# Supplementary material for: Characterisation of the androgen regulation of glycine N-methyltransferase in prostate cancer cells
Source: PubMed Central journal article supplement (PMC3821059; doi:10.1530/jme-13-0169), 2013-12
Supplement: supp_JME-13-0169_Supplementary_figure_1.pdf [file supp_JME-13-0169_Supplementary_figure_1.pdf]

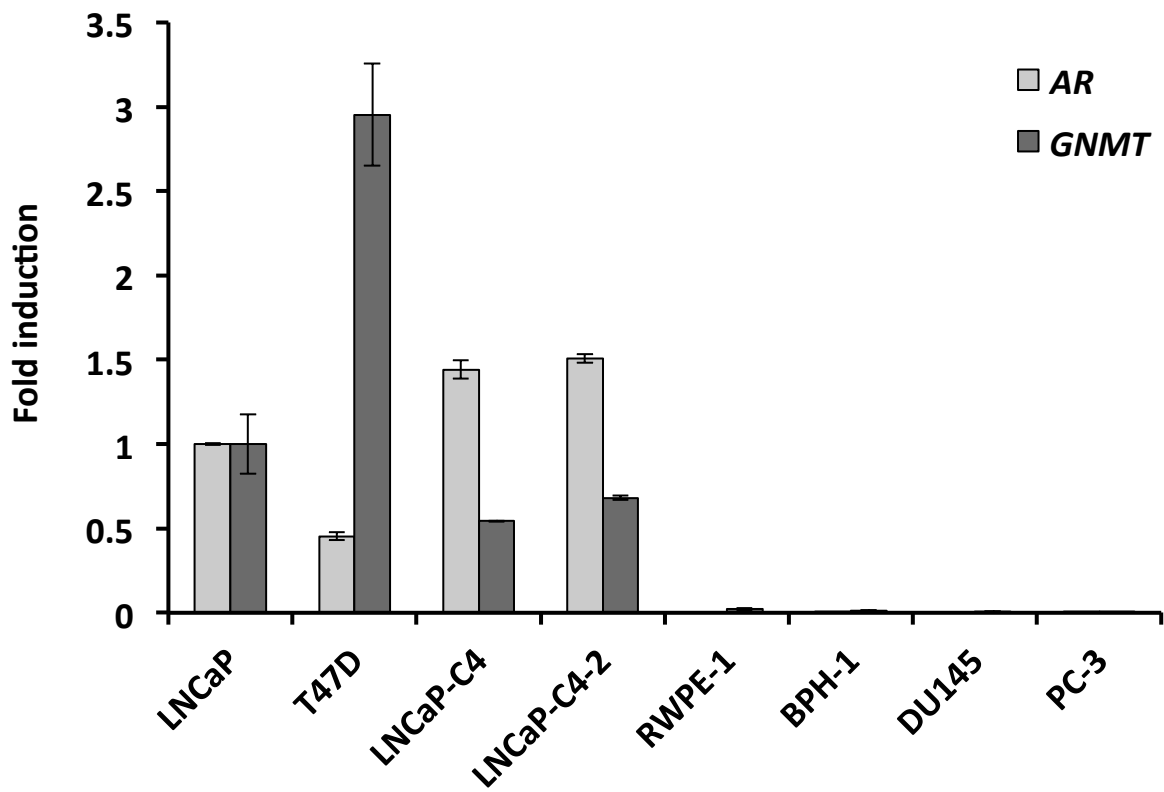

|              | LNCaP | T47D  | LNCaP-C4 | LNCaP-C4-2B | RWPE-1       | BPH-1 | Du145        | PC-3  |
|--------------|-------|-------|----------|-------------|--------------|-------|--------------|-------|
| AR Ct mean   | 20.65 | 23.18 | 22.11    | 21.8        | Undetermined | 30.11 | Undetermined | 35.1  |
| GNMT Ct mean | 24.05 | 23.85 | 26.88    | 26.3        | 29.57        | 29.83 | 30.86        | 31.83 |

Supplementary Fig.1. GNMT is expressed exclusively in AR positive cell lines. The breast cancer T47D cell line together with a panel of prostate cell lines were cultured in medium containing 10% FCS. RNA was prepared and TaqMan RT-PCR for *GNMT* and *AR* was performed. *AR* and *GNMT* expression in cell lines is shown relative to the expression in LNCaP cells. Results are shown as mean values of three replicates with error bars showing s.e.m.
