# Supplementary material for: Characterisation of the androgen regulation of glycine N-methyltransferase in prostate cancer cells
Source: PubMed Central journal article supplement (PMC3821059; doi:10.1530/jme-13-0169), 2013-12
Supplement: supp_JME-13-0169_Supplementary_table_2.pdf [file supp_JME-13-0169_Supplementary_table_2.pdf]

## Supplementary Table 2

TaqMan Assay-on Demand primers (Applied Biosystems)

| <b>Gene</b>    | <b>Assay Identification N.</b> |
|----------------|--------------------------------|
| <i>GNMT</i>    | Hs00219089_m1                  |
| <i>AR</i>      | Hs00171172_m1                  |
| <i>PSA</i>     | Hs00377590_s1                  |
| <i>NDRG1</i>   | Hs00608389_m1                  |
| <i>TMPRSS2</i> | Hs00237175_m1                  |
