# Supplementary material for: Characterisation of the androgen regulation of glycine N-methyltransferase in prostate cancer cells
Source: PubMed Central journal article supplement (PMC3821059; doi:10.1530/jme-13-0169), 2013-12
Supplement: supp_JME-13-0169_Supplementary_table_3.pdf [file supp_JME-13-0169_Supplementary_table_3.pdf]

### Supplementary Table 3

Oligonucleotide sequences used for the EMSA assay

| ARE                | Name                 | Sequence (5' – 3')      |
|--------------------|----------------------|-------------------------|
| GNMT-ARE wild-type | ARE <sub>GNMT</sub>  | ATGGTGGACAGCGTGTACCGGAC |
| GNMT-ARE mutant    | ARE <sub>GNMT*</sub> | ATGGTGGACAGCGACGCGTGGAC |
| PSA-ARE I          | ARE <sub>PSA</sub>   | TTGCAGAACAGCAAGTGCTAGCT |
