# Supplementary material for: Characterisation of the androgen regulation of glycine N-methyltransferase in prostate cancer cells
Source: PubMed Central journal article supplement (PMC3821059; doi:10.1530/jme-13-0169), 2013-12
Supplement: supp_JME-13-0169_Supplementary_table_4.pdf [file supp_JME-13-0169_Supplementary_table_4.pdf]

## Supplementary Table 4

ChIP primers for real-time PCR

| <b>Primer</b>          | <b>Sequence (5' – 3')</b>      |
|------------------------|--------------------------------|
| Forward (PSA enhancer) | TGACAGTAAACAAATCTGTTGTAAGAGACA |
| Reverse (PSA enhancer) | AGCAGGCATCCTTGCAAGAT           |
| Forward (PSA negative) | TCCACTCCAGCTCTAAGATGGT         |
| Reverse (PSA negative) | CAGGTAAACTCCAAGCACAGTGA        |
| Forward (GNMT ARE)     | AGGATGGTGGACAGCGTGTA           |
| Reverse (GNMT ARE)     | AAGCAGCCATGCCTTGTA             |
